# Supplementary material
Source: PubMed Central journal article supplement (PMC6416449)
Supplement: supp_RA118.005251_139964_2_supp_253205_pjxcsr.pdf [file supp_RA118.005251_139964_2_supp_253205_pjxcsr.pdf]

**Table S1. Representative peptides for mDAT identified by MS/MS**

| Residue number | Peptide sequence                                                 | Mascot Score | Observed  | Mr(expt)  | Mr(calc)  | Delta (ppm) | Expect   |
|----------------|------------------------------------------------------------------|--------------|-----------|-----------|-----------|-------------|----------|
| 6-19           | K.CSVGPMSSV VAPAK.E                                              | 72           | 695.3438  | 1388.6731 | 1388.6792 | -4.40       | 1e-005   |
| 6-19           | K.CSVGPMSSV VAPAK.E + Oxidation (M)                              | 72           | 703.3430  | 1404.6714 | 1404.6741 | -1.95       | 1.1e-005 |
| 6-27           | K.CSVGPMSSV VAPAKEPNAVGP.R.E                                     | 61           | 737.3682  | 2209.0827 | 2209.0984 | -7.07       | 0.00021  |
| 6-27           | K.CSVGPMSSV VAPAKEPNAVGP.R.E + Deamidated (NQ)                   | 53           | 737.7001  | 2210.0783 | 2210.0824 | -1.83       | 0.0013   |
| 6-27           | K.CSVGPMSSV VAPAKEPNAVGP.R.E + Oxidation (M)                     | 59           | 742.6997  | 2225.0774 | 2225.0933 | -7.13       | 0.00037  |
| 6-27           | K.CSVGPMSSV VAPAKEPNAVGP.R.E + Deamidated (NQ); Oxidation (M)    | 94           | 743.0298  | 2226.0675 | 2226.0773 | -4.39       | 1.2e-007 |
| 20-27          | K.EPNAVGP.R.E                                                    | 46           | 420.2232  | 838.4319  | 838.4297  | 2.65        | 0.0021   |
| 20-27          | K.EPNAVGP.R.E + Deamidated (NQ)                                  | 40           | 420.7142  | 839.4137  | 839.4137  | 0.043       | 0.0095   |
| 36-60          | K.EQNGVQLT NSTLINPPQTPVEVQER.E + Deamidated (NQ)                 | 36           | 931.4699  | 2791.3878 | 2791.3988 | -3.93       | 0.069    |
| 36-60          | K.EQNGVQLT NSTLINPPQTPVEVQER.E + 2 Deamidated (NQ)               | 15           | 931.7993  | 2792.3760 | 2792.3828 | -2.45       | 7.8      |
| 36-60          | K.EQNGVQLT NSTLINPPQTPVEVQER.E + Deamidated (NQ); Phospho (ST)   | 55           | 958.1257  | 2871.3552 | 2871.3651 | -3.45       | 0.0011   |
| 36-60          | K.EQNGVQLT NSTLINPPQTPVEVQER.E + 2 Deamidated (NQ); Phospho (ST) | 40           | 958.4501  | 2872.3284 | 2872.3491 | -7.23       | 0.036    |
| 66-85          | K.KIDFLLSVIGFAVDLANVWR.F                                         | 58           | 759.4261  | 2275.2564 | 2275.2729 | -7.22       | 8.7e-005 |
| 86-92          | R.FPYLCYK.N                                                      | 16           | 495.7411  | 989.4676  | 989.4681  | -0.46       | 2.8      |
| 126-133        | R.EGAAGVWK.I                                                     | 40           | 409.2164  | 816.4182  | 816.4130  | 6.36        | 0.011    |
| 134-139        | K.ICPVLK.G                                                       | 25           | 365.2225  | 728.4305  | 728.4255  | 6.85        | 0.23     |
| 219-227        | R.GVLHLHQSR.G                                                    | 51           | 523.7967  | 1045.5789 | 1045.5781 | 0.76        | 0.00081  |
| 219-227        | R.GVLHLHQSR.G + Deamidated (NQ)                                  | 24           | 524.2909  | 1046.5672 | 1046.5621 | 4.88        | 0.49     |
| 228-236        | R.GIDDLGPPR.W                                                    | 50           | 470.2498  | 938.4851  | 938.4821  | 3.16        | 0.0012   |
| 260-282        | K.TSGKVVWITATMPYVVLTALLR.G                                       | 45           | 844.8183  | 2531.4329 | 2531.4549 | -8.70       | 0.00059  |
| 260-282        | K.TSGKVVWITATMPYVVLTALLR.G + Oxidation (M)                       | 15           | 850.1583  | 2547.4530 | 2547.4499 | 1.24        | 0.47     |
| 264-282        | K.VVWITATMPYVVLTALLR.G                                           | 44           | 720.4235  | 2158.2486 | 2158.2588 | -4.72       | 0.00061  |
| 264-282        | K.VVWITATMPYVVLTALLR.G + Oxidation (M)                           | 69           | 1088.1315 | 2174.2485 | 2174.2537 | -2.39       | 2.3e-006 |
| 283-294        | R.GVTLPGAMDGIR.A                                                 | 32           | 593.8146  | 1185.6146 | 1185.6176 | -2.56       | 0.062    |
| 283-294        | R.GVTLPGAMDGIR.A + Oxidation (M)                                 | 60           | 601.8132  | 1201.6119 | 1201.6125 | -0.51       | 0.00013  |
| 295-303        | R.AYLSVDFYR.L                                                    | 40           | 567.2849  | 1132.5552 | 1132.5553 | -0.044      | 0.015    |
| 337-343        | K.FTNNCYR.D                                                      | 28           | 487.7087  | 973.4029  | 973.4076  | -4.81       | 0.11     |
| 374-379        | K.HNVPIR.D                                                       | 29           | 368.2186  | 734.4227  | 734.4187  | 5.34        | 0.049    |
| 509-520        | K.QMTGQRPNLYWR.L                                                 | 55           | 517.2611  | 1548.7615 | 1548.7619 | -0.31       | 0.00059  |
| 509-520        | K.QMTGQRPNLYWR.L + Oxidation (M)                                 | 45           | 522.5919  | 1564.7539 | 1564.7569 | -1.91       | 0.0069   |
| 515-520        | R.PNLYWR.L                                                       | 22           | 424.7254  | 847.4363  | 847.4341  | 2.69        | 0.68     |
| 579-587        | K.FCSLPGSFR.E                                                    | 28           | 535.7603  | 1069.5061 | 1069.5015 | 4.26        | 0.21     |
| 588-598        | R.EKLAYAITPEK.D                                                  | 24           | 631.8477  | 1261.6808 | 1261.6918 | -8.71       | 0.4      |
| 588-600        | R.EKLAYAITPEKDR.Q                                                | 50           | 638.8460  | 1275.6775 | 1275.6823 | -3.73       | 0.0012   |
| 590-598        | K.LAYAITPEK.D                                                    | 42           | 503.2844  | 1004.5542 | 1004.5542 | -0.026      | 0.0049   |
| 590-600        | K.LAYAITPEKDR.Q                                                  | 60           | 638.8507  | 1275.6869 | 1275.6823 | 3.61        | 9.6e-005 |
| 601-609        | R.QLVDRGEVR.Q                                                    | 18           | 536.2980  | 1070.5815 | 1070.5833 | -1.59       | 1.3      |
| 610-614        | R.QFTLR.H                                                        | 35           | 332.6956  | 663.3765  | 663.3704  | 9.26        | 0.014    |
| 615-619        | R.HWLLV.-                                                        | 20           | 667.3943  | 666.3870  | 666.3853  | 2.51        | 0.3      |

**Table S2.** MS identification of PP2B in the mDAT complex

| Uniprot ID <sup>1</sup> | Protein name                                                                                               | Residue | Peptide sequence                 | Mascot Score <sup>2</sup><br>(for each peptide) |                       |
|-------------------------|------------------------------------------------------------------------------------------------------------|---------|----------------------------------|-------------------------------------------------|-----------------------|
|                         |                                                                                                            |         |                                  | WT                                              | DAT <sup>-/-</sup> KO |
| PP2BA_MOUSE             | Serine/threonine-protein phosphatase 2B catalytic subunit alpha isoform (PP2B catalytic subunit $\alpha$ ) | 20-28   | AVPFPPSHR                        | 18                                              | -                     |
|                         |                                                                                                            | 33-42   | EVFDNDGKPR                       | 14, 13, 25, 15                                  | -                     |
|                         |                                                                                                            | 43-47   | VDILK                            | 13                                              | -                     |
|                         |                                                                                                            | 101-112 | LFEVGGSPANTR                     | 25, 38, 19, 22                                  | 14                    |
|                         |                                                                                                            | 113-122 | YLFLGDYVDR                       | 39, 44, 22, 29, 29                              | 10                    |
|                         |                                                                                                            | 244-254 | TQEHFTHNTVR                      | 15, 16, 25                                      | -                     |
|                         |                                                                                                            | 400-405 | IRAIGK                           | 15                                              | -                     |
|                         |                                                                                                            | 406-414 | M <sub>ox</sub> ARVFSVLR         | -                                               | 13                    |
|                         |                                                                                                            | 415-424 | EESESVLTLK                       | 12                                              | -                     |
|                         |                                                                                                            | 425-441 | GLTPTGM <sub>ox</sub> LPSGVLSGGK | 12                                              | 26, 41                |
| 442-459                 | QTLQSATVEAIEADEAIK                                                                                         | 12, 13  | -                                |                                                 |                       |
| 488-501                 | DAMPSDANLNSINK                                                                                             | 37      | -                                |                                                 |                       |

<sup>1</sup> <http://www.uniprot.org/>

<sup>2</sup> The ions score for an MS/MS match is based on the calculated probability, P, that the observed match between the experimental data and the database sequence is a random event. The reported score is  $-10\log(P)$  ([http://www.matrixscience.com/help/interpretation\\_help.html](http://www.matrixscience.com/help/interpretation_help.html)).

M<sub>ox</sub>: Oxidation at Methionine

**Table S3.** Number of identified phosphopeptides from hDAT WT, hDAT T48A mutant and rDAT transiently expressed in tsA201 cells upon OA treatment (0.5  $\mu$ M, 1 hr)

|                | Peptide sequence                                                                                                                                                     | # of phosphopeptide | # of non-phosphopeptide |
|----------------|----------------------------------------------------------------------------------------------------------------------------------------------------------------------|---------------------|-------------------------|
| hDAT WT + OA   | <sup>20</sup> EPNAVGPKEVELILVKEQNGVQLTSSTLTNPR <sup>51</sup><br><sup>28</sup> EVELILVKEQNGVQLTSSTLTNPR <sup>51</sup><br><sup>36</sup> EQNGVQLTSSTLTNPR <sup>51</sup> | 6                   | 45                      |
| hDAT T48A + OA | <sup>20</sup> EPNAVGPKEVELILVKEQNGVQLTSSTLANPR <sup>51</sup><br><sup>36</sup> EQNGVQLTSSTLANPR <sup>51</sup>                                                         | 0                   | 51                      |
| rDAT WT + OA   | <sup>36</sup> EQNGVQLTNSTLINPPQTPVEAQR <sup>60</sup>                                                                                                                 | 0                   | 18                      |

The numbers (#) of phospho- and non-phosphopeptide denote the sum of the different peptide sequences displayed in the second column

**Table S4.** Number of identified phosphopeptides from hDAT T48A mutant and rDAT stably expressed in LLC-PK<sub>1</sub> cells upon OA treatment (0.5 μM, 1 hr)

|                                  | Peptide sequence                                                                                     | # of phosphopeptide | # of non-phosphopeptide |
|----------------------------------|------------------------------------------------------------------------------------------------------|---------------------|-------------------------|
| hDAT T48A + OA<br>(stable cells) | <sup>20</sup> EPNAVGPKEVELILVKEQNGVQLTSSTLTNPR <sup>51</sup>                                         | 0                   | 47 (ion trap)           |
|                                  | <sup>28</sup> EVELILVKEQNGVQLTSSTLTNPR <sup>51</sup><br><sup>36</sup> EQNGVQLTSSTLTNPR <sup>51</sup> | 0                   | 239 (QTOF)              |
| rDAT WT + OA<br>(stable cells)   | <sup>36</sup> EQNGVQLTNSTLINPPQTPVEAQR <sup>60</sup>                                                 | 0                   | 121 (QTOF)              |

The numbers (#) of phospho- and non-phosphopeptide denote the sum of the different peptide sequences displayed in the second column
